# Supplementary material for: Analysis of Physicochemical and Structural Properties Determining HIV-1 Coreceptor Usage
Source: PubMed Central journal article supplement (PMC3605109; doi:10.1371/journal.pcbi.1002977), 2013-03-21
Supplement: pcbi.1002977.s015.pdf [file pcbi.1002977.s015.pdf]

| <b>dataset</b> | <b>sequences<br/>(X4 virus)</b> | <b>features</b> | <b>AUC</b> | <b>sensitivity</b> |
|----------------|---------------------------------|-----------------|------------|--------------------|
| HOMER          | 954 (167)                       | 59              | 0.774      | 0.463              |
| HOMER-filter   | 412 (39)                        | 95              | 0.657      | 0.313              |
| HOMER-ambi     | 542 (128)                       | 22              | 0.794      | 0.288              |
| HOMER-gap      | 954 (167)                       | 106             | 0.774      | 0.303              |
