# Supplementary material for: Analysis of Physicochemical and Structural Properties Determining HIV-1 Coreceptor Usage
Source: PLoS Comput Biol. 2013 Mar 21;9(3):e1002977. doi: 10.1371/journal.pcbi.1002977 (PMC3605109; doi:10.1371/journal.pcbi.1002977)
Supplement: Table S2 — Therapy outcome prediction using structure-based model. (XLS) [file pcbi.1002977.s016.xls]

## Sheet: structural_descriptor
				CLINICAL	therapy MCC=	0.339302	trofile MCC=	0.663		CLONAL	therapy MCC=	0.200278	trofile MCC=	-0.067
case	tropism	therapy outcome		score	FDR [%]	probability R5	probability X4	classification		score	FDR [%]	probability R5	probability X4	classification
46		-		0.18701	2.88767	0.694364	0.305636	1		-0.134637	96.1127	0.947756	0.0522442	0
58	R5X4	-		0.175757	3.01488	0.656842	0.343158	1		0.031669	31.5919	0.880768	0.119232	0
33		-		0.730785	0.36891	0.131729	0.868271	1		1.07895	0.421637	0.755269	0.244731	1
34	R5	-		-0.0148206	81.1347	0.92304	0.0769598	0		0.0197852	39.058	0.886628	0.113372	0
32	R5	-		-0.0130926	79.5828	0.933302	0.0666976	0		-0.00314605	58.6796	0.77913	0.22087	0
52		+		0.67156	0.572446	0.87021	0.12979	1		0.567422	2.4784	0.570006	0.429994	1
17	R5	+		0.552995	0.941356	0.360055	0.639945	1		0.879946	0.96668	0.392427	0.607573	1
44	R5X4	+		0.228358	2.21346	0.982277	0.0177234	1		-1.24146	100	0.999945	5.51569e-05	0
24		+		0.194921	2.77318	0.95318	0.0468203	1		0.0259742	35.0679	0.84235	0.15765	0
15	R5X4	+		0.175266	3.0276	0.69344	0.30656	1		0.239258	5.90292	0.581935	0.418065	0
2	R5	+		0.139084	4.4142	0.924733	0.0752667	1		-0.0702009	92.0712	0.926872	0.0731279	0
36	R5	+		0.0997794	7.06017	0.820483	0.179517	1		-0.0642722	91.1251	0.840575	0.159425	0
1		+		0.0825264	9.31179	0.783961	0.216039	0		0.183044	7.87742	0.794602	0.205398	0
29	R5	+		0.0745653	10.6348	0.82947	0.17053	0		0.0821895	15.5389	0.804493	0.195507	0
30		+		0.0745653	10.6348	0.82947	0.17053	0		0.0821895	15.5389	0.804493	0.195507	0
45		+		0.0730097	11.08	0.764053	0.235947	0		0.0460197	24.3418	0.808679	0.191321	0
51	R5	+		0.0611671	13.9931	0.785167	0.214833	0		0.0264379	34.7594	0.885417	0.114583	0
56	R5	+		0.0528229	16.779	0.870314	0.129686	0		-0.00428243	59.6668	0.918675	0.0813252	0
42	R5	+		0.0494976	18.242	0.878135	0.121865	0		0.109357	12.464	0.892236	0.107764	0
48	R5	+		0.0480282	18.8017	0.803466	0.196534	0		0.0731948	16.958	0.851813	0.148187	0
9		+		0.0460798	20.0356	0.84492	0.15508	0		0.0061191	50.1028	0.882697	0.117303	0
54	R5	+		0.0458316	20.201	0.867794	0.132206	0		0.0691435	17.9042	0.901074	0.0989262	0
57	R5	+		0.0390606	24.1827	0.930994	0.0690058	0		0.0621258	19.601	0.830115	0.169885	0
4	R5	+		0.0311773	30.3142	0.837575	0.162425	0		0.175692	8.31962	0.777521	0.222479	0
39		+		0.0309621	30.4541	0.881326	0.118674	0		-0.0121198	65.9194	0.931021	0.0689793	0
38	R5	+		0.0261075	34.2959	0.827623	0.172377	0		-0.0275759	77.3241	0.905175	0.0948245	0
21		+		0.0233174	36.9673	0.90178	0.0982201	0		-0.0325358	79.8848	0.949757	0.0502435	0
14		+		0.019368	40.9872	0.867692	0.132308	0		0.0225218	37.2892	0.88585	0.11415	0
3	R5	+		0.0135661	47.8565	0.859838	0.140162	0		0.0379329	28.2086	0.85082	0.14918	0
64		+		0.0134046	48.0728	0.880119	0.119881	0		-0.0240674	75.2057	0.929392	0.0706078	0
8	R5	+		0.0133975	48.0728	0.884955	0.115045	0		0.123684	11.3842	0.830927	0.169073	0
53	R5	+		0.0130364	48.429	0.884337	0.115663	0		-0.156623	96.7709	0.95796	0.0420399	0
37		+		0.00785247	54.6877	0.926803	0.0731971	0		-0.0441093	87.4229	0.961264	0.038736	0
25		+		0.00695072	55.769	0.82848	0.17152	0		0.0697264	17.7602	0.943426	0.056574	0
16		+		0.00652658	56.1888	0.967414	0.0325858	0		0.0586248	20.5368	0.886227	0.113773	0
63	R5	+		0.00311317	61.5316	0.892992	0.107008	0		0.0097017	46.6475	0.905432	0.0945679	0
27		+		0.00273795	62.0023	0.972291	0.0277093	0		0.0492088	23.2517	0.850333	0.149667	0
50		+		0.00183462	63.3634	0.889389	0.110611	0		-0.0144934	67.9864	0.807511	0.192489	0
60	R5	+		-0.00661533	74.0109	0.907768	0.0922317	0		-0.0037819	59.2246	0.89261	0.10739	0
62		+		-0.00874931	76.2371	0.933425	0.0665755	0		-0.00531144	60.4689	0.917781	0.0822192	0
47	R5	+		-0.0116144	78.5523	0.922225	0.0777746	0		-0.0103113	64.5413	0.907755	0.0922449	0
49	R5	+		-0.0133952	79.8753	0.927475	0.0725249	0		0.0300991	32.4661	0.866522	0.133478	0
10		+		-0.0178706	83.221	0.922013	0.0779869	0		0.00748275	48.6631	0.899476	0.100524	0
35		+		-0.0194524	84.3531	0.927696	0.0723042	0		0.0026353	53.2291	0.900635	0.0993647	0
22		+		-0.0348558	93.1815	0.940066	0.0599341	0		-0.0671036	91.5364	0.940344	0.0596558	0
19	R5	+		-0.0455101	96.3618	0.946458	0.0535415	0		-0.0357433	81.5611	0.948259	0.0517413	0
28		+		-0.0481582	96.7434	0.958885	0.0411146	0		-0.0425687	86.9601	0.925394	0.0746062	0
7	R5	+		-0.0730222	98.2191	0.918321	0.0816786	0		-0.175862	97.1514	0.969966	0.0300338	0
13		+		-0.0798613	98.3717	0.964708	0.0352924	0		0.0941202	14.0169	0.843954	0.156046	0
20		+		-0.0800521	98.3844	0.984093	0.0159071	0		-0.0363176	81.849	0.88589	0.11411	0
12	R5	+		-0.0834685	98.448	0.969424	0.0305763	0		-0.0315963	79.5249	0.915202	0.084798	0
23		+		-0.0931339	98.5625	0.866632	0.133368	0		-0.0163744	69.673	0.96963	0.0303704	0
11	R5	+		-0.112821	98.7788	0.99965	0.000349756	0		-0.0689689	91.9272	0.909172	0.0908275	0
